# Supplementary material
Source: HighWire-hosted journal article supplement (https://jnm.snmjournals.org/highwire/filestream/97642/field_highwire_adjunct_files/0/241414_Supplemental_Data.pdf)
Supplement: 241414_Supplemental_Data.pdf [file 241414_Supplemental_Data.pdf]

**Supplemental Table 1. Treatment cycles and cumulative administered radioactivity for <sup>177</sup>Lu, <sup>90</sup>Y and Duo-PRRT with <sup>177</sup>Lu and <sup>90</sup>Y (N=495)**

| Variables                                       | N   | %    | Cumulative radioactivity |      |
|-------------------------------------------------|-----|------|--------------------------|------|
|                                                 |     |      | Mean                     | SD   |
| Number of PRRT cycles (total)                   | 495 | 100  | 25.7                     | 10.8 |
| 2                                               | 43  | 8.7  | 10.0                     | 2.8  |
| 3                                               | 85  | 17.2 | 16.6                     | 4.2  |
| 4                                               | 102 | 20.6 | 21.4                     | 5.0  |
| 5                                               | 87  | 17.6 | 25.8                     | 4.8  |
| 6                                               | 80  | 16.2 | 32.2                     | 6.1  |
| 7                                               | 56  | 11.3 | 35.7                     | 5.7  |
| 8                                               | 23  | 4.6  | 44.4                     | 6.5  |
| 9                                               | 14  | 2.8  | 45.8                     | 7.7  |
| 10                                              | 5   | 1.0  | 49.9                     | 9.4  |
| Number of <sup>177</sup> Lu-PRRT cycles (total) | 60  | 12.1 | 22.2                     | 9.3  |
| 2                                               | 0   | 0    | 0                        | 0    |
| 3                                               | 16  | 3.2  | 19.2                     | 2.7  |
| 4                                               | 18  | 4.0  | 27.3                     | 3.1  |
| 5                                               | 16  | 3.2  | 31.9                     | 0.4  |
| 6                                               | 7   | 0.4  | 41.9                     | 1.1  |
| 7                                               | 3   | 1.2  | 49.7                     | 3.2  |
| 8                                               | 0   | 0    | 0                        | 0    |
| 9                                               | 0   | 0    | 0                        | 0    |
| 10                                              | 0   | 0    | 0                        | 0    |
| Number of <sup>90</sup> Y-PRRT cycles (total)   | 20  | 4.0  | 8.7                      | 3.0  |
| 2                                               | 11  | 2.2  | 7.4                      | 2.7  |
| 3                                               | 5   | 1.0  | 10.0                     | 3.4  |
| 4                                               | 4   | 0.8  | 10.8                     | 1.4  |
| 5                                               | 0   | 0    | 0                        | 0    |
| 6                                               | 0   | 0    | 0                        | 0    |
| 7                                               | 0   | 0    | 0                        | 0    |
| 8                                               | 0   | 0    | 0                        | 0    |
| 9                                               | 0   | 0    | 0                        | 0    |
| 10                                              | 0   | 0    | 0                        | 0    |
| Number of Duo-PRRT cycles (total)               | 415 | 83.8 | 27.1                     | 10.5 |
| 2                                               | 32  | 6.5  | 9.9                      | 1.9  |
| 3                                               | 64  | 12.9 | 16.2                     | 4.0  |
| 4                                               | 80  | 16.2 | 20.7                     | 4.0  |
| 5                                               | 71  | 14.3 | 25.6                     | 4.7  |
| 6                                               | 73  | 14.7 | 31.4                     | 5.6  |
| 7                                               | 53  | 10.7 | 35.7                     | 5.7  |
| 8                                               | 23  | 4.6  | 44.4                     | 6.5  |
| 9                                               | 14  | 2.8  | 45.8                     | 7.7  |
| 10                                              | 5   | 1.0  | 49.9                     | 9.4  |
